# Supplementary material
Source: ML conference proceedings conference paper supplement (https://openaccess.thecvf.com/content/WACV2023/html/Gokhale_Improving_Diversity_With_WACV_2023_paper.html)
Supplement: Supplementary file 1 [file Gokhale_Improving_Diversity_With_WACV_2023_supplemental.pdf]

# Supplementary Material for: Improving Diversity with Adversarially Learned Transformations for Domain Generalization

Tejas Gokhale\*<sup>§</sup> Rushil Anirudh # Jayaraman J. Thiagarajan # Bhavya Kailkhura #  
Chitta Baral<sup>§</sup> Yezhou Yang<sup>§</sup>

<sup>1</sup> Arizona State University <sup>2</sup> Lawrence Livermore National Laboratory

{tgokhale, chitta, yz.yang}@asu.edu {anirudh1, jjayaram, kailkhural}@asu.edu

This document contains training settings, additional results and visualizations to supplement the main paper. We also discuss the limitations of ALT and scope for future work in this direction. Code to reproduce experiments has been released publicly: <https://github.com/tejas-gokhale/ALT>.

## 1. Training Settings

Table 1 shows the training settings and hyperparameters used for experiments on each benchmark. See Algorithm 1 in the main paper for context and relevant equations.

## 2. Detailed Results

We provide detailed results including standard deviation values for our models on the PACS and Office-Home benchmarks, for each source domain. We compare these with RandConv [5], AugMix [3], and a combination of RandConv and AugMix which utilizes AugMix as one of the two augmentations in the consistency constraint of RandConv. Results of the PACS experiments are shown in Tables 3, 4, 5, 6, when using P, A, C, and S as the source datasets, respectively. Results of the Office-Home experiments are shown in Tables 7, 8, 9, 10, when using R, A, C, and P as the source datasets, respectively.

## 3. Visualizations

In this section, we provide additional visualizations and qualitative examples for augmented images generated by ALT, for Digits (Figure 4), PACS (Figures 5, 6, 7, 8), and Office-Home PACS (Figures 9, 10, 11, 12). In each figure, the first row shows input images  $x$ , the second row shows the outputs of the diversity module  $r(x)$ , and the third row shows the outputs of the adversary network  $g(x)$ .

In Figure 2 and 3 we show an illustration of the diversity introduced by ALT in comparison to the source distribution, the target (OOD) distribution, and the distribution of RandConv augmentations, for the PACS and OfficeHome benchmarks respectively. The diversity introduced by ALT is much larger and wide-spread than data augmentation techniques such as RandConv.

## 4. Limitations and Future Directions

In this paper we have explored the effectiveness of ALT on three standard domain generalization benchmarks. For fair comparison, for each baseline model, we use the same model architecture and training settings as the backbone – for instance, ERM, RandConv, AugMix and ALT are all trained with the same hyperparameters as shown in Table 1. For significance of results, we have repeated each experiment (including those in analyses) for 5 different seeds and have reported mean and standard deviation.

### 4.1. Complexity of Adversary Network.

One limitation (and therefore scope for future work) is that we have considered one family of architecture for our adversary network  $g$  – fully convolutional image-to-image translation networks. We conduct additional analysis to understand how this choice affects generalization performance, and compare performance when using between 2 and 6 convolutional layers. We reuse all other training settings from our benchmark model  $ALT_{RandConv}$  on both Digits and PACS. Results are shown in Table 2.

For PACS and OfficeHome, we observe that all ALT models compared are better than previous baselines including AugMix and RandConv. For Digits, we observe that performance of ALT with a 2-layer  $g$  is close to RandConv, and is greater than all previous baselines for higher depth of the network. We do not see a clear correlation across datasets between the number of layers and the domain generalization performance. Investigating the dynamics of model capac-

\*Work done during internship at LLNL

| Variable         | Digits                                                                        | PACS         | Office-Home  |
|------------------|-------------------------------------------------------------------------------|--------------|--------------|
| $f$ architecture | DigitNet [4]                                                                  | ResNet18 [2] | ResNet50 [2] |
| $g$ architecture | $\{\text{conv}_{kernel=3, stride=1, padding=1, leakyReLU_{p=0.2}}\} \times 4$ |              |              |
| $\rho_0, \phi_0$ | Kaiming Normal Initialization [1]                                             |              |              |
| $T$              | 10000                                                                         | 2000         | 2000         |
| $T_{pre}$        | 1250                                                                          | 400          | 400          |
| $\eta$           | 1e-4                                                                          | 0.004        | 0.004        |
| $m_{adv}$        | 10                                                                            | 10           | 10           |
| $\eta_{adv}$     | 5e-6                                                                          | 5e-5         | 5e-5         |
| $w_r$            | 1.0                                                                           | 1.0          | 1.0          |
| $\lambda_{KL}$   | 0.75                                                                          | 0.75         | 0.75         |

Table 1. Training settings and hyper-parameters for experiments on each benchmark.

| Benchmark  | FCN Number of Layers |       |       |       |       |
|------------|----------------------|-------|-------|-------|-------|
|            | 2                    | 3     | 4     | 5     | 6     |
| Digits     | 72.75                | 73.74 | 74.10 | 73.87 | 74.15 |
| PACS       | 63.40                | 63.92 | 64.41 | 64.20 | 63.78 |
| OfficeHome | 59.67                | 59.56 | 59.79 | 59.42 | 59.45 |

Table 2. Effect of the depth (number of convolutional layers) of the adversary network  $g$  on average domain generalization on all three benchmarks.

ity of the adversary network and how it may affect domain generalization, is an interesting direction for future work.

It may be possible that more complex generative architectures (i.e. greater complexity of transformations) may be needed for larger domain shift is larger, to model diversity and adversity for a given source domain. Thus the choice of architecture for  $g$  is an interesting direction; nevertheless, in this paper we show that the simple fully convolutional architecture gives us performance boosts in all three datasets.

We believe that ideas presented in this paper, although evaluated on image classification, have the potential of being widely applicable to many other vision tasks for domain generalization. They may also be applied to other application areas such as audio or text, where the transformation function  $g$  may take different forms.

## References

- [1] Kaiming He, Xiangyu Zhang, Shaoqing Ren, and Jian Sun. Delving deep into rectifiers: Surpassing human-level performance on imagenet classification. In *Proceedings of the IEEE international conference on computer vision*, pages 1026–1034, 2015. 2
- [2] Kaiming He, Xiangyu Zhang, Shaoqing Ren, and Jian Sun. Deep residual learning for image recognition. In *2016 IEEE Conference on Computer Vision and Pattern Recognition, CVPR 2016, Las Vegas, NV, USA, June 27-30, 2016*, pages 770–778. IEEE Computer Society, 2016. 2
- [3] Dan Hendrycks, Norman Mu, Ekin Dogus Cubuk, Barret Zoph, Justin Gilmer, and Balaji Lakshminarayanan. Augmix: A simple data processing method to improve robustness and uncertainty. In *8th International Conference on Learning Representations, ICLR 2020, Addis Ababa, Ethiopia, April 26-30, 2020*. OpenReview.net, 2020. 1
- [4] Riccardo Volpi, Hongseok Namkoong, Ozan Sener, John C. Duchi, Vittorio Murino, and Silvio Savarese. Generalizing to unseen domains via adversarial data augmentation. In *Advances in Neural Information Processing Systems*, pages 5339–5349, 2018. 2
- [5] Zhenlin Xu, Deyi Liu, Junlin Yang, Colin Raffel, and Marc Niethammer. Robust and generalizable visual representation learning via random convolutions. In *International Conference on Learning Representations*, 2020. 1

| Method                  | Photo*                    | Art-Painting              | Cartoon                   | Sketch                    | Target Avg.               | PACS Avg.                 |
|-------------------------|---------------------------|---------------------------|---------------------------|---------------------------|---------------------------|---------------------------|
| RandConv                | 96.407 $\pm 0.757$        | 61.309 $\pm 2.316$        | 37.577 $\pm 2.257$        | 50.463 $\pm 9.018$        | 49.783 $\pm 4.255$        | 61.439 $\pm 3.217$        |
| AugMix                  | <b>99.532</b> $\pm 0.438$ | <b>68.633</b> $\pm 0.950$ | <b>33.788</b> $\pm 1.205$ | <b>36.304</b> $\pm 2.801$ | <b>46.242</b> $\pm 1.122$ | <b>59.564</b> $\pm 0.930$ |
| RandConv + AugMix       | 98.363 $\pm 0.438$        | 65.527 $\pm 3.060$        | 39.300 $\pm 6.237$        | 40.901 $\pm 5.073$        | 48.576 $\pm 4.031$        | 61.023 $\pm 3.001$        |
| ALT <sub>g-only</sub>   | 99.064 $\pm 0.286$        | <b>68.770</b> $\pm 0.932$ | 43.387 $\pm 1.142$        | 50.832 $\pm 2.937$        | 54.330 $\pm 1.078$        | 65.513 $\pm 0.757$        |
| ALT <sub>RandConv</sub> | 98.947 $\pm 0.234$        | 68.740 $\pm 0.702$        | 40.828 $\pm 2.537$        | <b>56.024</b> $\pm 2.009$ | <b>55.197</b> $\pm 0.498$ | 66.135 $\pm 0.330$        |
| ALT <sub>AugMix</sub>   | 99.298 $\pm 0.438$        | 68.506 $\pm 0.836$        | <b>43.507</b> $\pm 2.615$ | 53.271 $\pm 4.149$        | 55.094 $\pm 1.876$        | <b>66.145</b> $\pm 1.387$ |

Table 3. SSDG performance on PACS for the P→ACS setting. \*Source Domain. **bold**: best result.

| Method                  | Photo                     | Art Painting*             | Cartoon                   | Sketch                    | Target Avg.               | PACS Avg.                 |
|-------------------------|---------------------------|---------------------------|---------------------------|---------------------------|---------------------------|---------------------------|
| RandConv                | 87.281 $\pm 0.796$        | 85.437 $\pm 0.532$        | 61.143 $\pm 2.752$        | 60.519 $\pm 4.050$        | 69.648 $\pm 2.152$        | 73.595 $\pm 1.582$        |
| AugMix                  | <b>95.317</b> $\pm 0.422$ | <b>93.077</b> $\pm 1.276$ | 64.061 $\pm 0.361$        | 55.027 $\pm 2.195$        | 71.469 $\pm 0.637$        | 76.871 $\pm 0.581$        |
| RandConv + AugMix       | 90.743 $\pm 0.781$        | 90.481 $\pm 0.638$        | 64.206 $\pm 2.238$        | 62.515 $\pm 2.854$        | 72.488 $\pm 1.731$        | 76.986 $\pm 1.177$        |
| ALT <sub>g-only</sub>   | 94.934 $\pm 0.269$        | 91.058 $\pm 0.720$        | 63.524 $\pm 1.821$        | 63.813 $\pm 2.249$        | 74.090 $\pm 1.086$        | 78.332 $\pm 0.845$        |
| ALT <sub>RandConv</sub> | 93.593 $\pm 0.328$        | 92.596 $\pm 1.036$        | 64.044 $\pm 0.635$        | 65.991 $\pm 1.130$        | 74.543 $\pm 0.537$        | 79.056 $\pm 0.609$        |
| ALT <sub>AugMix</sub>   | 93.174 $\pm 0.437$        | 91.442 $\pm 0.638$        | <b>65.683</b> $\pm 1.656$ | <b>68.226</b> $\pm 2.453$ | <b>75.694</b> $\pm 1.214$ | <b>79.631</b> $\pm 0.856$ |

Table 4. SSDG performance on PACS for the A→PCS setting. \*Source Domain. **bold**: best result.

| Method                  | Photo                     | Art-Painting              | Cartoon*                  | Sketch                    | Target Avg.               | PACS Avg.                 |
|-------------------------|---------------------------|---------------------------|---------------------------|---------------------------|---------------------------|---------------------------|
| RandConv                | 73.677 $\pm 1.814$        | 57.051 $\pm 1.764$        | 91.66 $\pm 0.876$         | 72.855 $\pm 2.314$        | 67.861 $\pm 1.550$        | 73.810 $\pm 1.317$        |
| AugMix                  | 84.599 $\pm 0.997$        | 68.281 $\pm 2.085$        | <b>96.287</b> $\pm 0.940$ | 71.097 $\pm 0.609$        | 74.659 $\pm 1.088$        | 80.066 $\pm 0.897$        |
| RandConv + AugMix       | 78.790 $\pm 0.975$        | 65.400 $\pm 1.611$        | 93.840 $\pm 1.020$        | 71.285 $\pm 2.730$        | 71.825 $\pm 1.315$        | 77.329 $\pm 1.105$        |
| ALT <sub>g-only</sub>   | 84.575 $\pm 1.047$        | 68.867 $\pm 2.126$        | 94.768 $\pm 0.43$         | 74.421 $\pm 0.441$        | 75.954 $\pm 1.119$        | 80.658 $\pm 0.929$        |
| ALT <sub>RandConv</sub> | 83.916 $\pm 0.51$         | 68.086 $\pm 1.901$        | 95.190 $\pm 0.686$        | <b>74.487</b> $\pm 0.505$ | 75.496 $\pm 0.799$        | 80.420 $\pm 0.644$        |
| ALT <sub>AugMix</sub>   | <b>85.964</b> $\pm 1.098$ | <b>71.943</b> $\pm 1.234$ | 94.599 $\pm 0.560$        | 74.172 $\pm 0.752$        | <b>77.360</b> $\pm 0.734$ | <b>81.670</b> $\pm 0.667$ |

Table 5. SSDG performance on PACS for the C→PAS setting. \*Source Domain. **bold**: best result.

| Method                  | Photo                     | Art-Painting              | Cartoon                   | Sketch*                   | Target Avg.               | PACS Avg.                 |
|-------------------------|---------------------------|---------------------------|---------------------------|---------------------------|---------------------------|---------------------------|
| RandConv                | 46.132 $\pm 4.879$        | <b>52.168</b> $\pm 1.623$ | <b>63.942</b> $\pm 2.219$ | 94.264 $\pm 0.673$        | <b>54.081</b> $\pm 1.959$ | <b>64.126</b> $\pm 1.465$ |
| AugMix                  | 46.731 $\pm 2.916$        | 37.852 $\pm 1.878$        | 58.575 $\pm 1.747$        | 94.221 $\pm 0.711$        | 47.719 $\pm 1.723$        | 59.345 $\pm 1.268$        |
| RandConv + AugMix       | <b>54.359</b> $\pm 0.819$ | 46.074 $\pm 2.709$        | 61.246 $\pm 1.245$        | 94.171 $\pm 0.582$        | 53.893 $\pm 0.945$        | 63.963 $\pm 0.787$        |
| ALT <sub>g-only</sub>   | 49.305 $\pm 2.775$        | 39.658 $\pm 3.423$        | 61.109 $\pm 1.853$        | 94.573 $\pm 0.466$        | 50.024 $\pm 2.408$        | 61.161 $\pm 1.726$        |
| ALT <sub>RandConv</sub> | 51.305 $\pm 0.866$        | 41.787 $\pm 1.174$        | 62.773 $\pm 1.089$        | <b>94.724</b> $\pm 0.527$ | 51.955 $\pm 0.791$        | 62.647 $\pm 0.571$        |
| ALT <sub>AugMix</sub>   | 49.078 $\pm 2.072$        | 40.186 $\pm 2.494$        | 62.901 $\pm 0.358$        | 94.271 $\pm 0.624$        | 50.721 $\pm 1.414$        | 61.609 $\pm 1.103$        |

Table 6. SSDG performance on PACS for the S→PAC setting. \*Source Domain. **bold**: best result.

| Method                  | Real*                     | Art                       | Clipart                   | Product                   | Target Avg.               | Office-Home Avg.          |
|-------------------------|---------------------------|---------------------------|---------------------------|---------------------------|---------------------------|---------------------------|
| RandConv                | 83.028 $\pm$ 2.067        | 59.021 $\pm$ 0.916        | 47.269 $\pm$ 1.251        | 72.172 $\pm$ 0.418        | 59.487 $\pm$ 0.792        | 65.372 $\pm$ 1.096        |
| AugMix                  | 87.294 $\pm$ 1.21         | 64.101 $\pm$ 0.882        | 47.564 $\pm$ 0.158        | 75.956 $\pm$ 0.32         | 62.54 $\pm$ 0.345         | 68.729 $\pm$ 0.490        |
| RandConv + AugMix       | 81.514 $\pm$ 0.515        | 59.167 $\pm$ 0.722        | 48.180 $\pm$ 1.024        | 71.166 $\pm$ 0.445        | 59.504 $\pm$ 0.256        | 65.007 $\pm$ 0.226        |
| ALT <sub>g-only</sub>   | 86.514 $\pm$ 0.622        | 64.622 $\pm$ 0.490        | <b>53.327</b> $\pm$ 0.344 | 76.276 $\pm$ 0.117        | 64.742 $\pm$ 0.122        | 70.185 $\pm$ 0.138        |
| ALT <sub>RandConv</sub> | <b>87.477</b> $\pm$ 1.042 | <b>64.879</b> $\pm$ 0.439 | 53.097 $\pm$ 0.554        | 76.066 $\pm$ 0.447        | 64.681 $\pm$ 0.290        | <b>70.380</b> $\pm$ 0.312 |
| ALT <sub>AugMix</sub>   | 86.560 $\pm$ 0.980        | 64.860 $\pm$ 0.267        | 53.271 $\pm$ 0.799        | <b>76.286</b> $\pm$ 0.347 | <b>64.806</b> $\pm$ 0.327 | 70.244 $\pm$ 0.461        |

Table 7. SSDG performance on Office-Home for the R→ACP setting. \*Source Domain. **bold**: best result.

| Method                  | Real                      | Art*                      | Clipart                   | Product                   | Target Avg.               | Office-Home Avg.          |
|-------------------------|---------------------------|---------------------------|---------------------------|---------------------------|---------------------------|---------------------------|
| RandConv                | 66.915 $\pm$ 1.069        | 72.428 $\pm$ 2.066        | 42.387 $\pm$ 1.405        | 55.045 $\pm$ 1.547        | 54.782 $\pm$ 1.297        | 59.194 $\pm$ 1.427        |
| AugMix                  | <b>71.887</b> $\pm$ 0.432 | <b>80.494</b> $\pm$ 1.342 | 45.314 $\pm$ 0.768        | <b>61.882</b> $\pm$ 0.382 | 59.694 $\pm$ 0.427        | <b>64.894</b> $\pm$ 0.369 |
| RandConv + AugMix       | 65.620 $\pm$ 0.632        | 71.852 $\pm$ 1.758        | 42.606 $\pm$ 1.026        | 54.434 $\pm$ 0.774        | 54.220 $\pm$ 0.617        | 58.628 $\pm$ 0.862        |
| ALT <sub>g-only</sub>   | 71.193 $\pm$ 0.308        | 78.930 $\pm$ 1.146        | 47.340 $\pm$ 0.331        | 61.151 $\pm$ 0.561        | 59.895 $\pm$ 0.283        | 64.654 $\pm$ 0.259        |
| ALT <sub>RandConv</sub> | 71.754 $\pm$ 0.286        | 78.025 $\pm$ 1.181        | <b>48.328</b> $\pm$ 0.787 | 61.186 $\pm$ 0.429        | <b>60.423</b> $\pm$ 0.280 | 64.823 $\pm$ 0.474        |
| ALT <sub>AugMix</sub>   | 71.122 $\pm$ 0.540        | 79.095 $\pm$ 1.634        | 48.058 $\pm$ 0.632        | 61.156 $\pm$ 0.813        | 60.112 $\pm$ 0.590        | 64.858 $\pm$ 0.518        |

Table 8. SSDG performance on Office-Home for the A→RCP setting. \*Source Domain. **bold**: best result.

| Method                  | Real                      | Art                       | Clipart*                  | Product                   | Target Avg.               | Office-Home Avg.          |
|-------------------------|---------------------------|---------------------------|---------------------------|---------------------------|---------------------------|---------------------------|
| RandConv                | 58.944 $\pm$ 0.521        | 44.741 $\pm$ 0.714        | 80.320 $\pm$ 1.073        | 56.211 $\pm$ 1.141        | 53.299 $\pm$ 0.711        | 60.054 $\pm$ 0.771        |
| AugMix                  | 62.244 $\pm$ 0.526        | 49.309 $\pm$ 0.879        | <b>81.510</b> $\pm$ 0.885 | <b>58.939</b> $\pm$ 0.584 | 56.831 $\pm$ 0.530        | <b>63.000</b> $\pm$ 0.454 |
| RandConv + AugMix       | 57.914 $\pm$ 0.730        | 43.698 $\pm$ 0.511        | 77.986 $\pm$ 1.087        | 55.040 $\pm$ 0.683        | 52.217 $\pm$ 0.249        | 58.660 $\pm$ 0.417        |
| ALT <sub>g-only</sub>   | 61.968 $\pm$ 0.849        | 49.977 $\pm$ 0.987        | 80.320 $\pm$ 1.073        | 58.779 $\pm$ 0.743        | 56.908 $\pm$ 0.808        | 62.761 $\pm$ 0.733        |
| ALT <sub>RandConv</sub> | <b>62.264</b> $\pm$ 0.560 | 50.133 $\pm$ 0.956        | 80.732 $\pm$ 0.637        | 58.819 $\pm$ 0.558        | <b>57.072</b> $\pm$ 0.539 | 62.987 $\pm$ 0.455        |
| ALT <sub>AugMix</sub>   | 61.841 $\pm$ 0.382        | <b>50.426</b> $\pm$ 1.070 | 80.824 $\pm$ 0.510        | 58.839 $\pm$ 0.559        | 57.035 $\pm$ 0.580        | 62.982 $\pm$ 0.526        |

Table 9. SSDG performance on Office-Home for the C→RAP setting. \*Source Domain. **bold**: best result.

| Method                  | Real                      | Art                       | Clipart                   | Product*                  | Target Avg.               | Office-Home Avg.          |
|-------------------------|---------------------------|---------------------------|---------------------------|---------------------------|---------------------------|---------------------------|
| RandConv                | 66.318 $\pm$ 0.240        | 43.524 $\pm$ 0.664        | 43.365 $\pm$ 1.058        | 90.135 $\pm$ 0.643        | 51.069 $\pm$ 0.607        | 60.836 $\pm$ 0.372        |
| AugMix                  | <b>71.515</b> $\pm$ 0.706 | <b>50.041</b> $\pm$ 0.688 | 42.596 $\pm$ 0.619        | <b>91.622</b> $\pm$ 0.263 | 54.717 $\pm$ 0.518        | 63.943 $\pm$ 0.453        |
| RandConv + AugMix       | 65.523 $\pm$ 0.753        | 43.240 $\pm$ 1.454        | 41.710 $\pm$ 0.621        | 89.459 $\pm$ 0.785        | 50.158 $\pm$ 0.900        | 59.983 $\pm$ 0.865        |
| ALT <sub>g-only</sub>   | 70.082 $\pm$ 0.532        | 48.842 $\pm$ 0.648        | 46.877 $\pm$ 0.552        | 91.306 $\pm$ 0.544        | 55.267 $\pm$ 0.302        | 64.277 $\pm$ 0.171        |
| ALT <sub>RandConv</sub> | 70.530 $\pm$ 0.359        | 49.208 $\pm$ 0.418        | 47.025 $\pm$ 0.498        | 91.577 $\pm$ 0.506        | 55.588 $\pm$ 0.300        | 64.585 $\pm$ 0.212        |
| ALT <sub>AugMix</sub>   | 70.637 $\pm$ 0.301        | 49.318 $\pm$ 1.008        | <b>47.554</b> $\pm$ 0.458 | 91.396 $\pm$ 0.798        | <b>55.837</b> $\pm$ 0.383 | <b>64.726</b> $\pm$ 0.361 |

Table 10. SSDG performance on Office-Home for the P→RAC setting. \*Source Domain. **bold**: best result.

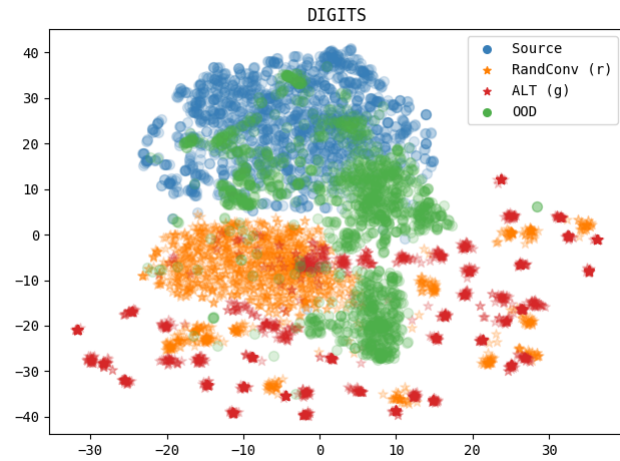

Figure 1. tSNE plot showing the discrepancy between the source distribution and the out-of-distribution datasets for the Digits benchmark.

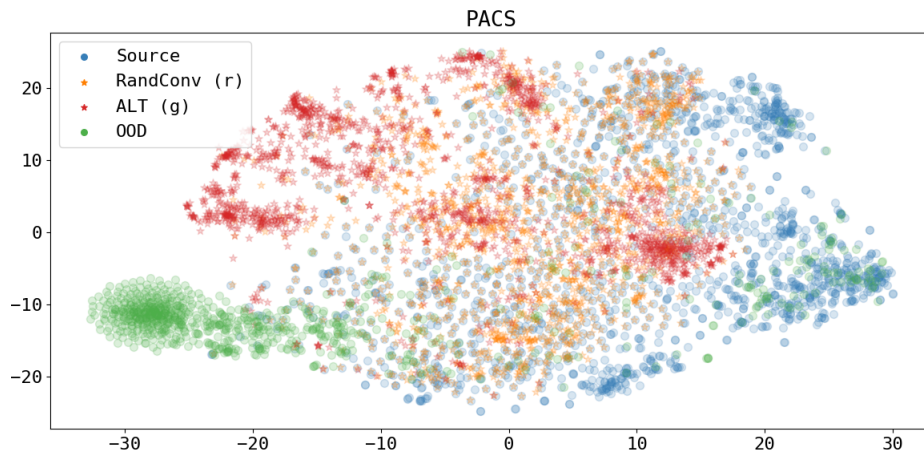

Figure 2. tSNE plot showing the discrepancy between the source distribution and the out-of-distribution datasets for the PACS benchmark.

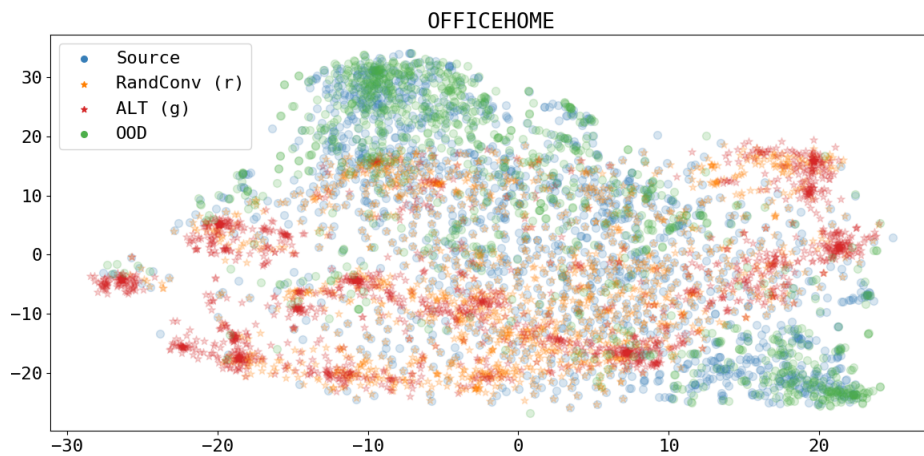

Figure 3. tSNE plot showing the discrepancy between the source distribution and the out-of-distribution datasets for the OfficeHome benchmark.



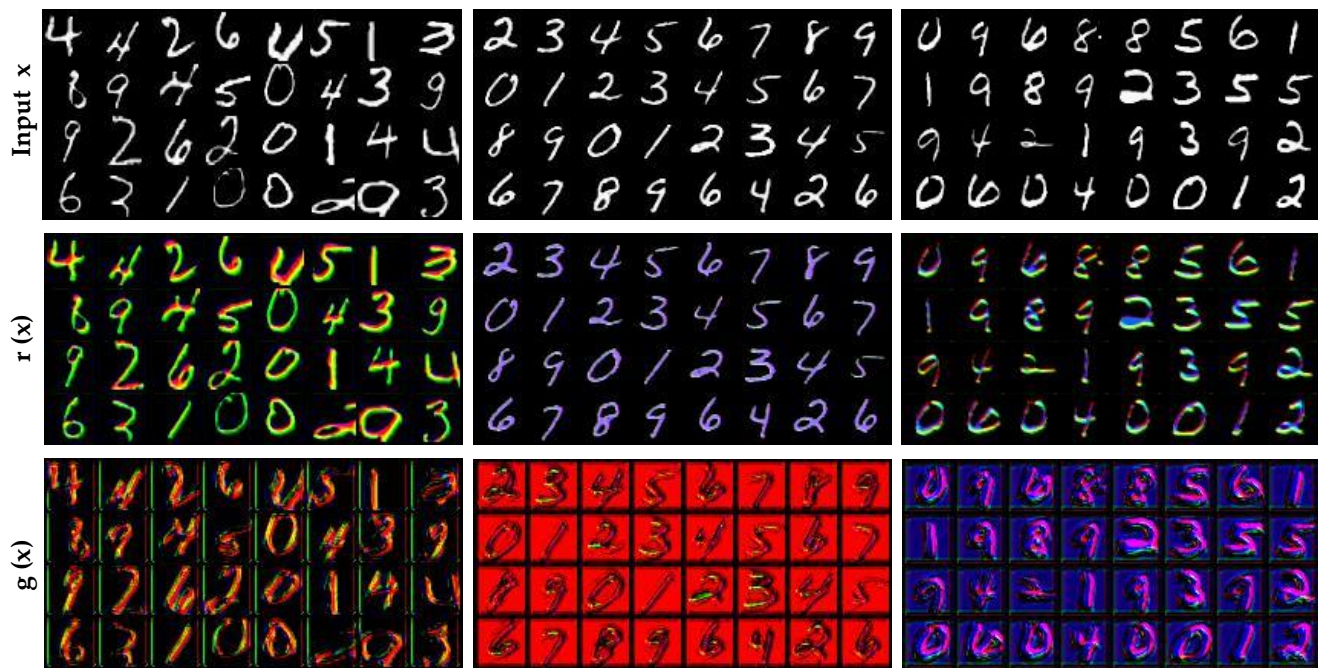

Figure 4. Digits: Comparison of images transformed by RandConv and  $ALT_{RandConv}$  with MNIST10k as source dataset.

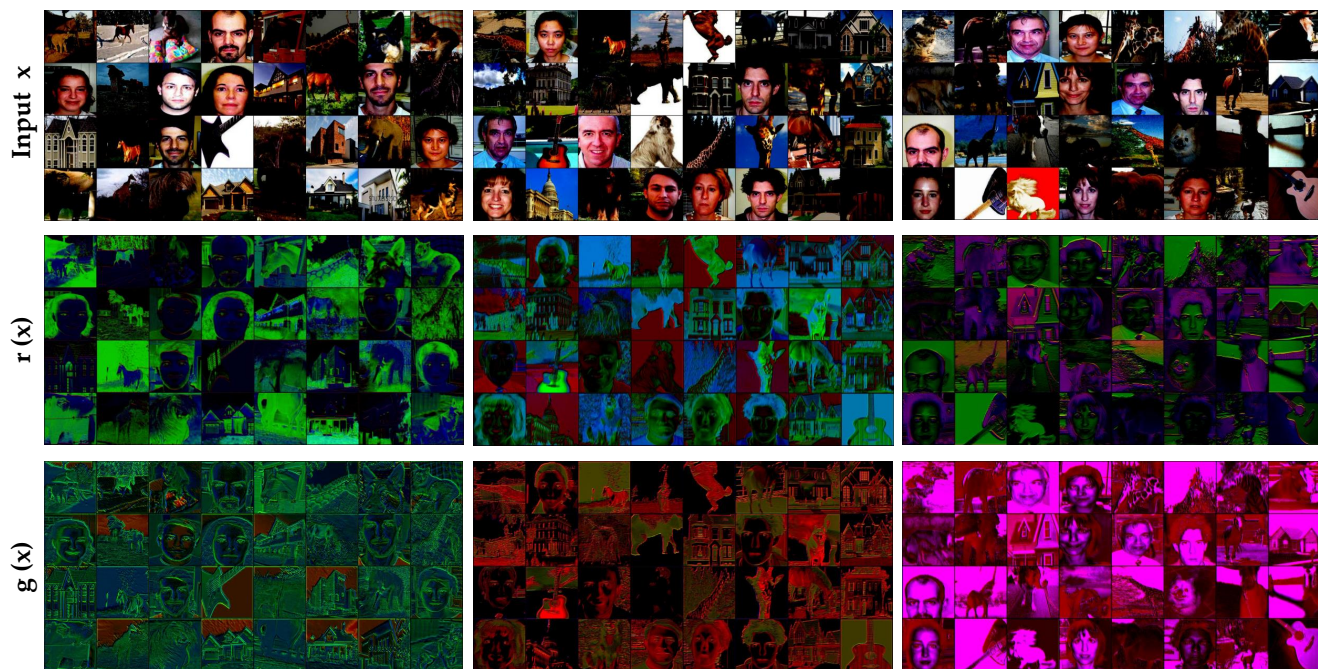

Figure 5. PACS: Comparison of images transformed by RandConv and  $ALT_{RandConv}$  with *Photo* as source dataset.



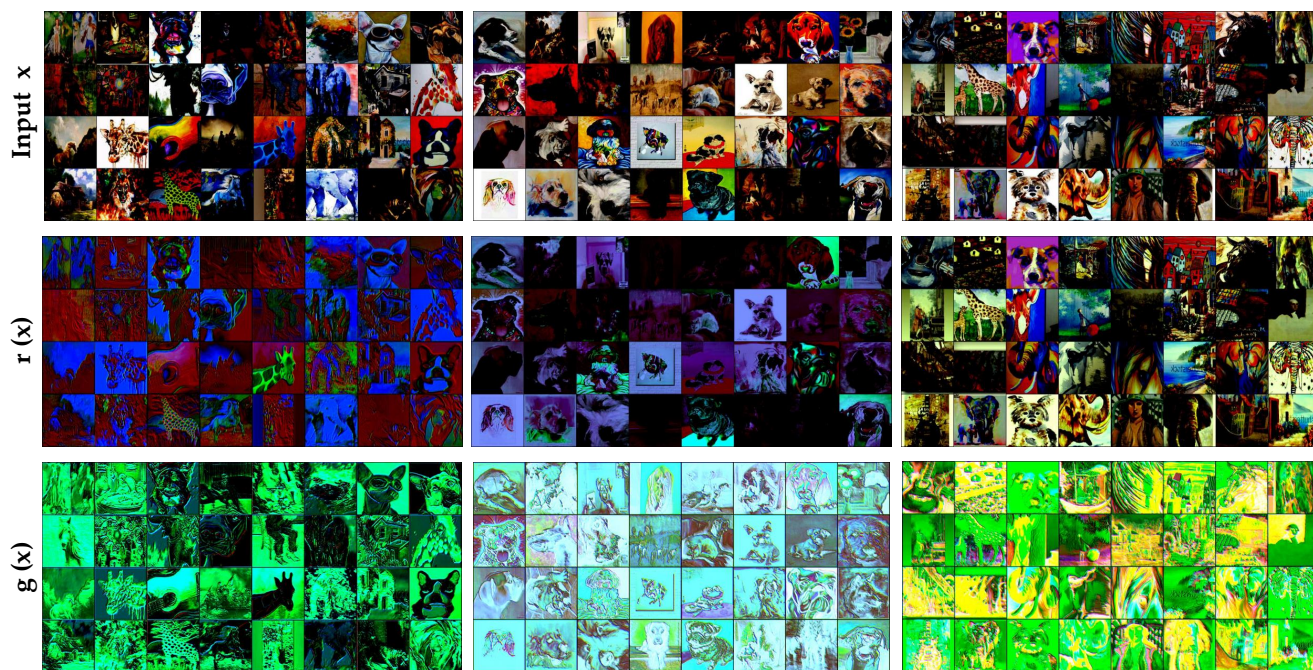

Figure 6. PACS: Comparison of images transformed by RandConv and  $ALT_{RandConv}$  with *Art-Painting* as source dataset.

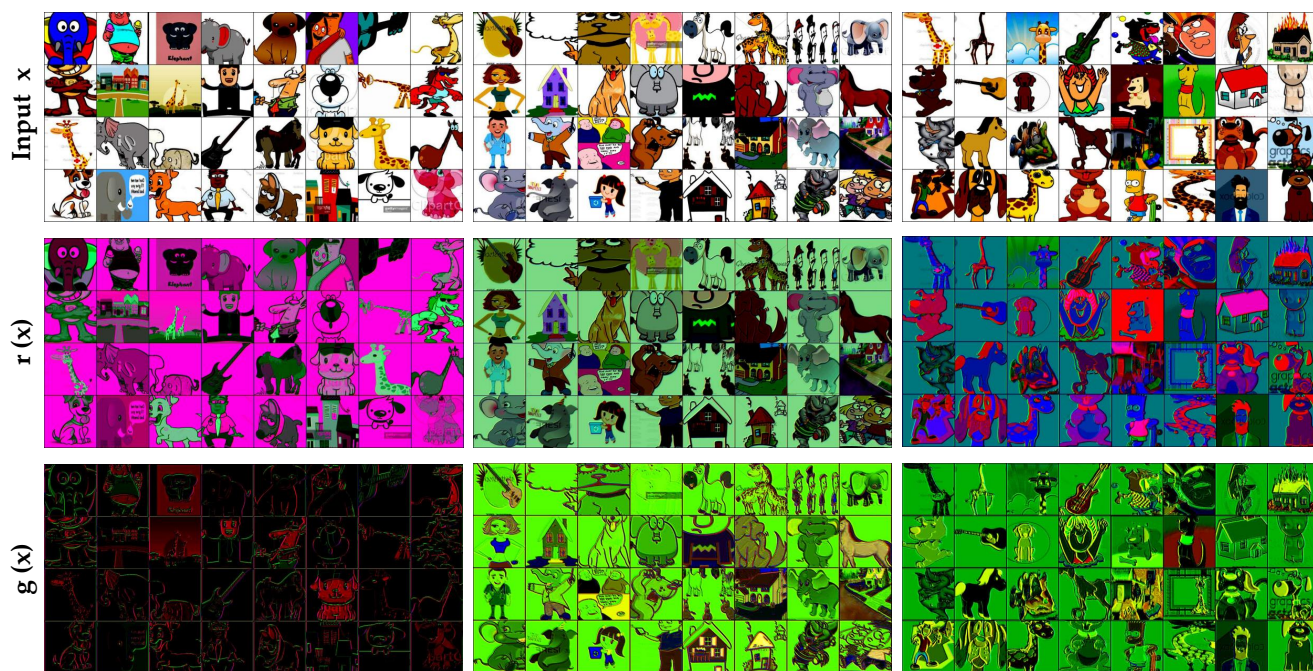

Figure 7. PACS: Comparison of images transformed by RandConv and  $ALT_{RandConv}$  with *Cartoon* as source dataset.



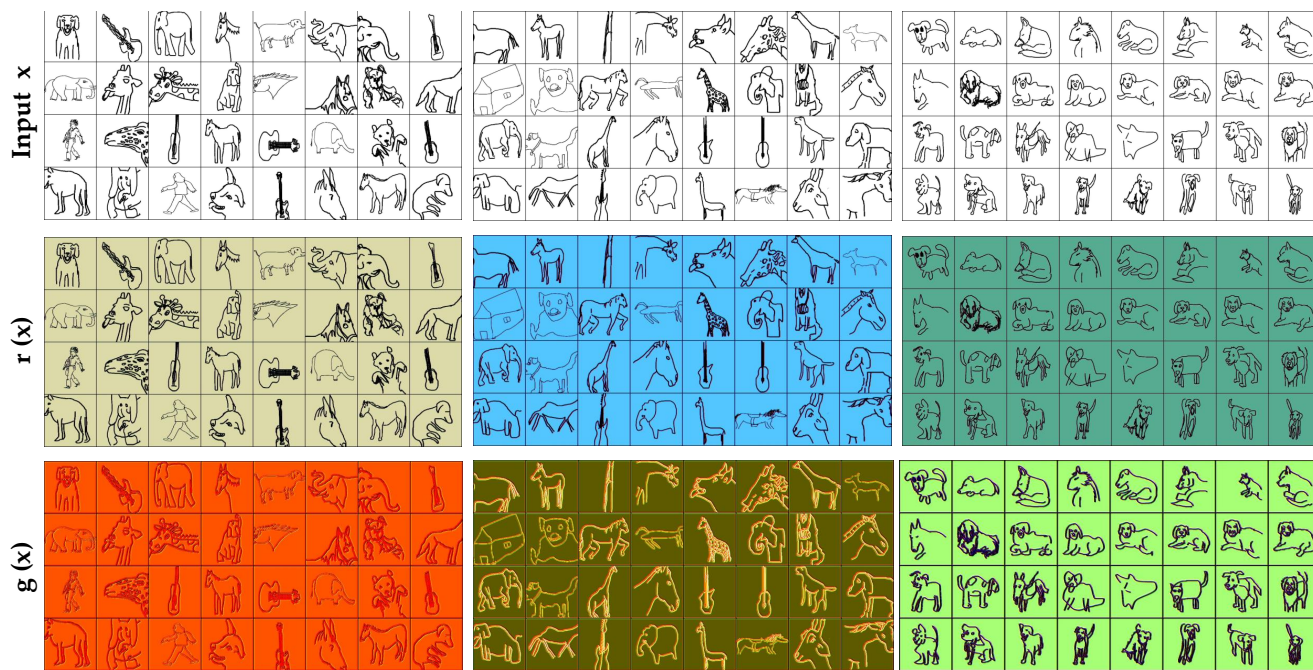

Figure 8. PACS: Comparison of images transformed by RandConv and  $ALT_{RandConv}$  with *Sketch* as source dataset.

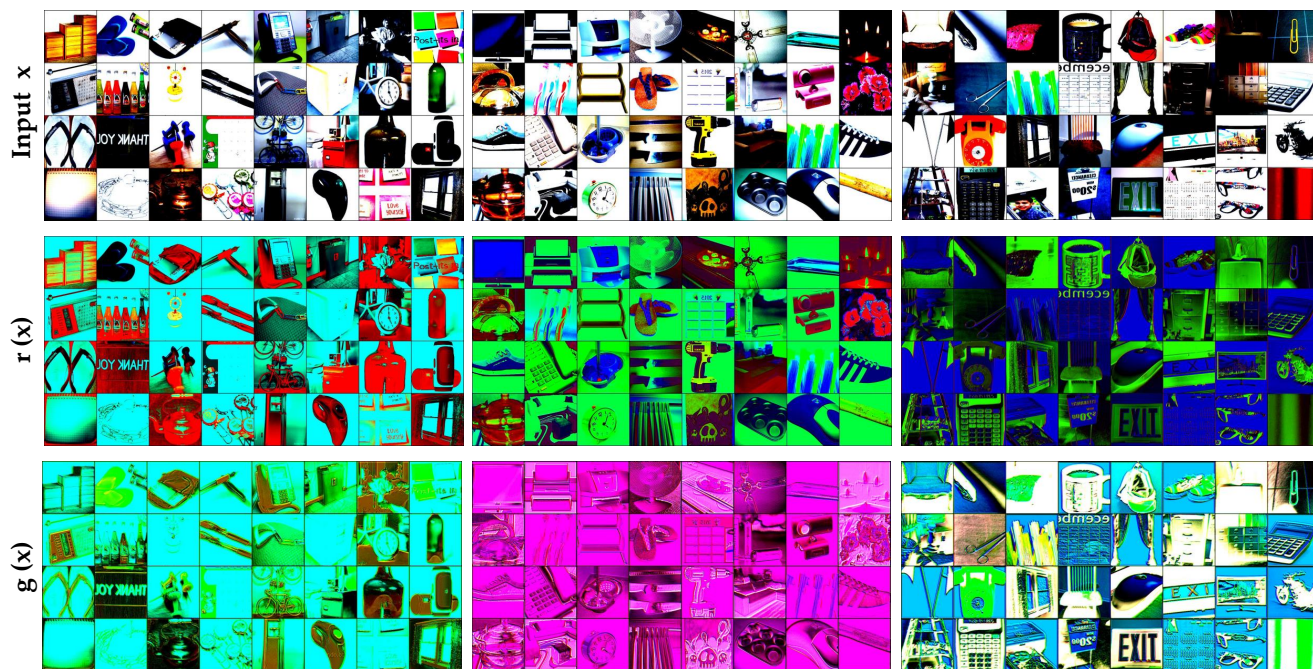

Figure 9. Office-Home: Comparison of images transformed by RandConv and  $ALT_{RandConv}$  with *Real* as source dataset.



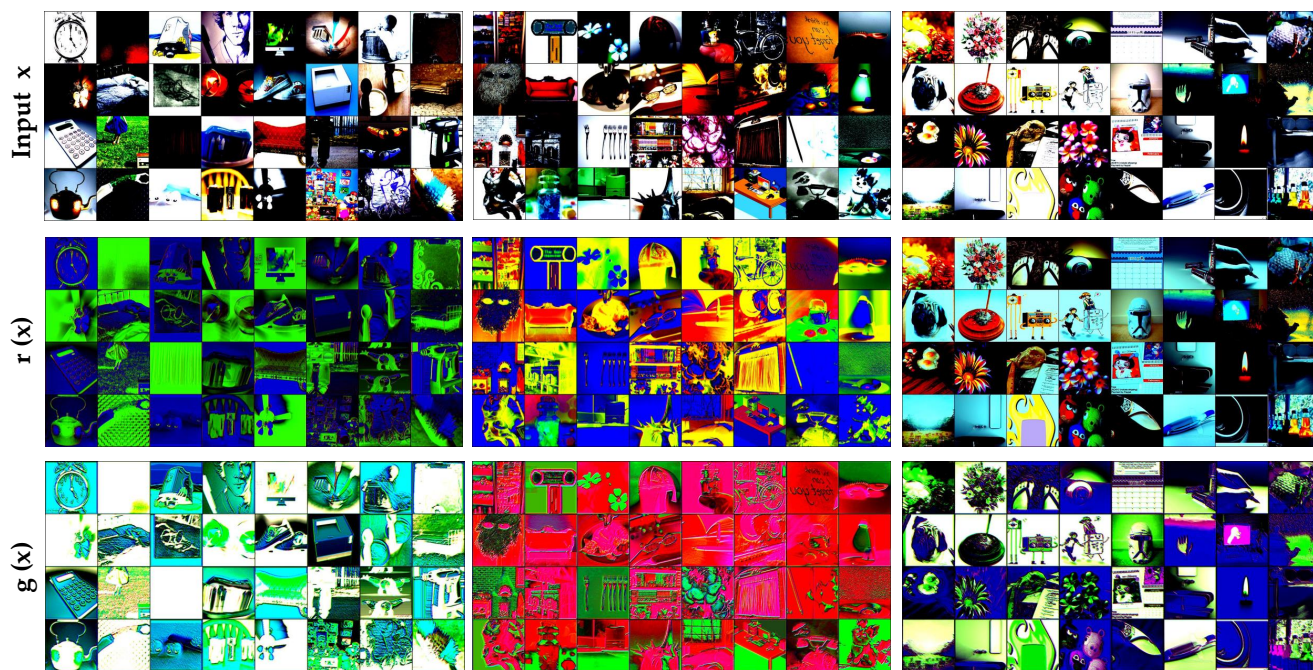

Figure 10. Office-Home: Comparison of images transformed by RandConv and  $ALT_{RandConv}$  with *Art* as source dataset.

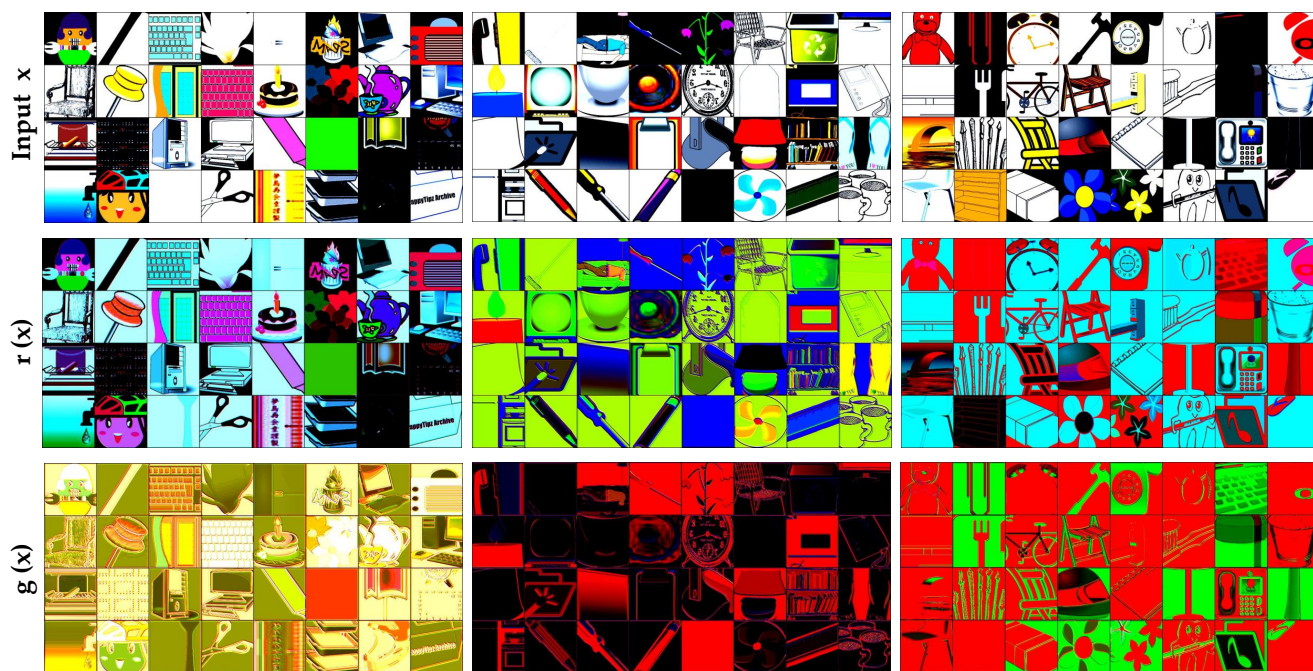

Figure 11. Office-Home: Comparison of images transformed by RandConv and  $ALT_{RandConv}$  with *Clipart* as source dataset.

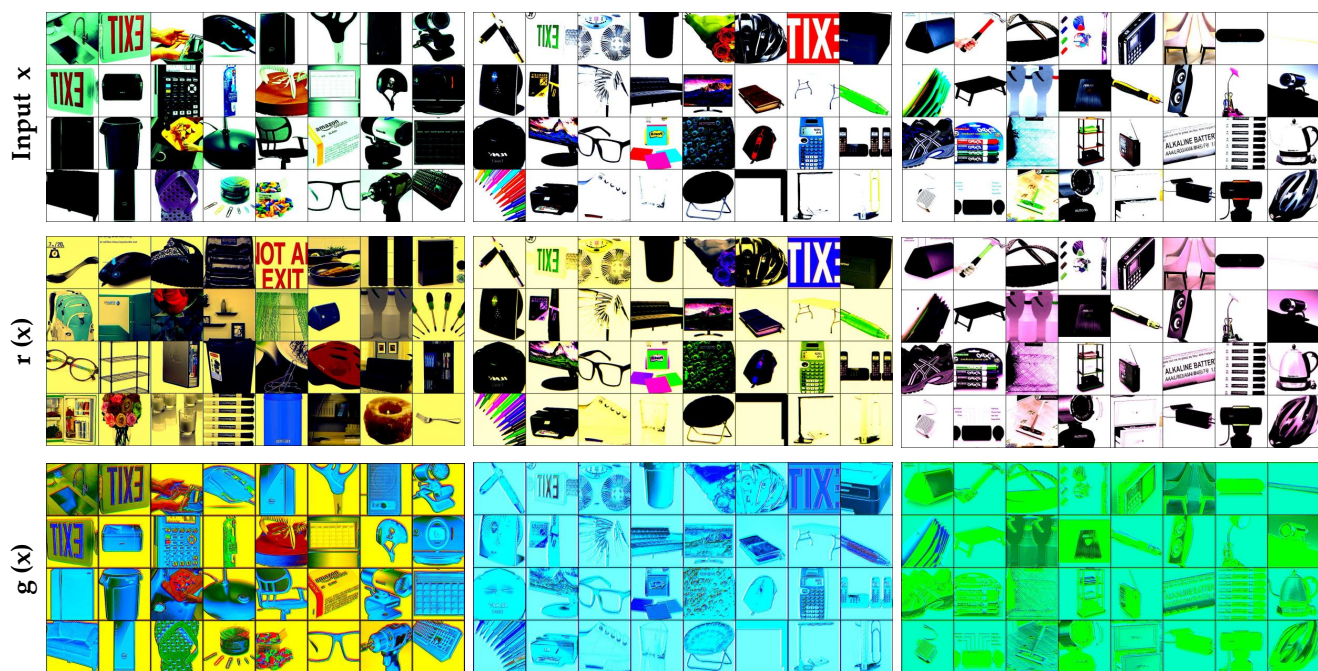

Figure 12. Office-Home: Comparison of images transformed by RandConv and  $ALT_{RandConv}$  with *Product* as source dataset.
